# Supplementary material
Source: PubMed Central journal article supplement (PMC4162783)
Supplement: supp_131534_five-stall-1-at-Appendix.pdf [file supp_131534_five-stall-1-at-Appendix.pdf]

## Appendix 1: References

1. Dvoskin LP, Rauhut AS, King-Pospisil KA, et al. Review of the pharmacology and clinical profile of bupropion, an antidepressant and tobacco use cessation agent. *CNS Drug Rev* 2006;12:178-207.
2. Kim D, Steinhart B. Seizures induced by recreational abuse of bupropion tablets via nasal insufflation. *CJEM* 2010;12:158-61.
3. Baribeau D, Araki KF. Intravenous bupropion: a previously undocumented method of abuse of a commonly prescribed antidepressant agent. *J Addict Med* 2013;7:216-7.
4. Yoon G, Westermeyer J. Intranasal bupropion abuse: case report. *Am J Addict* 2013;22:180.
5. Hilliard WT, Barloon L, Farley P, et al. Bupropion diversion and misuse in the correctional facility. *J Correct Health Care* 2013;19:211-7.
6. Starr P, Klein-Schwartz W, Spiller H, et al. Incidence and onset of delayed seizures after overdoses of extended-release bupropion. *Am J Emerg Med* 2009;27:911-5.
7. Belson MG, Kelley TR. Bupropion exposures: clinical manifestations and medical outcome. *J Emerg Med* 2002;23:223-30.
8. Sirianni AJ, Osterhoudt KC, Calello DP, et al. Use of lipid emulsion in the resuscitation of a patient with prolonged cardiovascular collapse after overdose of bupropion and lamotrigine. *Ann Emerg Med* 2008;51:412-5, 415.e1.
9. Spiller HA, Bottei E, Kalin L. Fatal bupropion overdose with post mortem blood concentrations. *Forensic Sci Med Pathol* 2008;4:47-50.
10. Chyka PA, Seger D, Krenzelok EP, et al. Position paper: single-dose activated charcoal. *Clin Toxicol* 2005;43:61-87.
11. Position paper: whole bowel irrigation [published erratum in *J Toxicol Clin Toxicol* 2004;42:1000]. *Clin Toxicol (Phila)* 2004;42:843-54.
12. Shah AS, Eddleston M. Should phenytoin or barbiturates be used as second-line anticonvulsant therapy for toxicological seizures? *Clin Toxicol (Phila)* 2010;48:800-5.
